# Supplementary material for: Predicting small molecule binding pockets on diacylglycerol kinases using chemoproteomics and AlphaFold
Source: RSC Chem Biol. 2023 May 15;4(6):422–30. doi: 10.1039/d3cb00057e (PMC10246554; doi:10.1039/d3cb00057e)
Supplement: CB-004-D3CB00057E-s002 [file CB-004-D3CB00057E-s002.xlsx]

## Sheet: A) Replicate Corr
Sample (HEK293T cells expressing DGKs)	Replicate	Mean	Std Dev	Correlation	Pearson's r value
DGKa/DGKz	1	11.2	8.69	1,2	0.64
	2	11.7	8.5	1,3	0.64
	3	11.6	8.47	2,3	0.72
DGKk/DGKq	1	10.85	8.81	1,2	0.55
	2	11.43	8.53	1,3	0.58
	3	11.7	8.56	2,3	0.73
DGKi/DGKe	1	9.71	8.92	1,2	0.49
	2	11.35	8.57	1,3	0.47
	3	11.06	8.57	2,3	0.75
DGKh/DGKb	1	8.24	8.86	1,2	0.37
	2	11.21	8.63	1,3	0.4
	3	11.22	8.65	2,3	0.76
DGKd/DGKg	1	8.57	8.88	1,2	0.5
	2	11.09	8.74	1,3	0.47
	3	11.52	8.71	2,3	0.74
					All Pearson's r values are significant at p < .001

## Sheet: B) DGK sites
Uniprot ID	Site position	Protein name	Peptide sequences	Mean	St.Dev.	Best Byonic score
P23743	169	DGKa	EIDY[+635.3]DGSGSVSQAEWVR	20	0.0324317	698.222
P23743	19	DGKa	Y[+635.3]M[+16]EYSTK	15.5185	6.27287	558.801
			Y[+635.3]MEYSTK
			Y[+635.3]MEYSTKK
P23743	240	DGKa	Y[+635.3]TVHDQC[+57]AM[+16]K	20	0	713.084
			Y[+635.3]TVHDQC[+57]AMK
P23743	258	DGKa	ALPC[+57]EVSTY[+635.3]AK	10.5287	5.31646	663.338
P23743	335	DGKa	DHILPPSSIY[+635.3]PSVLASGPDR	16.9945	6.36464	1129.31
P23743	399	DGKa	FQY[+635.3]ILNPR	20	0	608.907
P23743	42	DGKa	Y[+635.3]VQGDAIGYEGFQQFLK	20	10.0779	675.328
P23743	50	DGKa	YVQGDAIGY[+635.3]EGFQQFLK	20	0	856.319
P23743	544	DGKa	EKY[+635.3]PEK	9.72129	1.98161	502.347
P23743	669	DGKa	RLEVVGLEGAIEMGQIY[+635.3]TK	17.2928	4.43034	940.637
			LEVVGLEGAIEMGQIY[+635.3]TK
P23743	18	DGKa	GLISPSDFAQLQK[+635.3]YMEYSTK	20	6.6144	938.511
P23743	25	DGKa	YMEYSTK[+635.3]K	9.07342	NA	563.294
P23743	26	DGKa	K[+635.3]VSDVLK	20	0	522.036
P23743	260	DGKa	ALPC[+57]EVSTYAK[+635.3]SR	20	0	684.493
P23743	32	DGKa	VSDVLK[+635.3]LFEDGEMAK	13.3211	9.44546	568.274
P23743	353	DGKa	TSQK[+635.3]TMDDLNLSTSEALR	5.05841	1.48248	660.572
P23743	384	DGKa	IDPVPNTHPLLVFVNPK[+635.3]SGGK	6.563	5.61462	1082.55
P23743	411	DGKa	QVFNLLK[+635.3]DGPEIGLR	20	0	851.053
P23743	543	DGKa	EK[+635.3]YPEK	13.6775	5.79876	558.687
P23743	547	DGKa	EKYPEK[+635.3]FNSR	20	0.443527	564.147
Q9Y6T7	24	DGKb	YAEY[+635.3]STK	8.66674	6.48128	442.848
Q9Y6T7	280	DGKb	Y[+635.3]TVHER	5.93275	2.25824	384.774
Q9Y6T7	461	DGKb	FQY[+635.3]LLNPR	20	0	321.709
Q9Y6T7	101	DGKb	SK[+635.3]PALLSGGLR	20	0	518.056
Q9Y6T7	450	DGKb	SGGK[+635.3]QGER	20	8.69159	512.145
Q9Y6T7	787	DGKb	NQAPMLMGPPPK[+635.3]TGLFC[+57]SLVK	20	NA	683.013
P49619	160	DGKg	SSSSESPVVY[+635.3]LK	20	3.47683	717.438
P49619	20	DGKg	Y[+635.3]SEYSSK	20	3.52671	588.041
P49619	304	DGKg	QGLC[+57]C[+57]TY[+635.3]C[+57]K	14.4277	5.13099	521.991
P49619	358	DGKg	C[+57]Y[+635.3]QSVTAR	20	7.32133	602.446
P49619	424	DGKg	GELVM[+16]QY[+635.3]K	11.86	NA	609.819
			GELVMQY[+635.3]K
P49619	44	DGKg	QY[+635.3]DPHEPISYDVFK	20	0	684.959
P49619	52	DGKg	QYDPHEPISY[+635.3]DVFK	20	10.5272	806.214
P49619	535	DGKg	WGGGY[+635.3]EGGSLTK	16.2996	7.38878	666.377
P49619	26	DGKg	YSEYSSK[+635.3]K	8.69109	8.15685	562.739
P49619	356	DGKg	SIK[+635.3]C[+57]YQSVTAR	9.46236	6.3935	545.151
P49619	442	DGKg	IIPTPGTHPLLVLVNPK[+635.3]SGGR	20	0	789.746
P49619	510	DGKg	ANFAK[+635.3]HPPVAVLPLGTGNDLAR	20	0	779.857
P49619	542	DGKg	WGGGYEGGSLTK[+635.3]ILK	20	0	640.229
P49619	685	DGKg	K[+635.3]GVTDPK	9.86614	3.00255	526.833
Q16760	480	DGKd	QASSSTVTEDFSEDSEVQQILFY[+635.3]EDSVAAHLSK	20	NA	561.838
Q16760	721	DGKd	ILY[+635.3]PNVR	20	7.55623	512.285
Q16760	757	DGKd	LLINADPFNSEPETLEY[+635.3]YTEK	20	5.89919	1076.35
Q16760	767	DGKd	C[+57]VM[+16]NNY[+635.3]FGIGLDAK	20	0.743668	831.262
			C[+57]VMNNY[+635.3]FGIGLDAK
Q16760	801	DGKd	NMMWY[+635.3]GVLGTK	14.278	6.28423	744.437
			NM[+16]MWY[+635.3]GVLGTK
			NMM[+16]WY[+635.3]GVLGTK
Q16760	83	DGKd	TLY[+635.3]YAK	20	0	515.122
Q16760	84	DGKd	TLYY[+635.3]AK	20	4.3104	521.006
Q16760	927	DGKd	ISILGDEGVPVQVDGEAWVQPPGY[+635.3]IR	20	10.8753	888.507
Q16760	1018	DGKd	DMEQELAHAVNASSK[+635.3]SMDR	15.0727	NA	1155.26
			DMEQELAHAVNASSK[+635.3]SM[+16]DR
Q16760	1069	DGKd	M[+16]ALQLDPPQK[+635.3]EQLGSALAEMDR	20	NA	824.237
			MALQLDPPQK[+635.3]EQLGSALAEMDR
Q16760	1110	DGKd	LADTPWLC[+57]QSAEPGDEESVMLDLAK[+635.3]R	20	0	794.247
Q16760	1122	DGKd	LVTK[+635.3]FK	17.3321	6.79107	506.15
Q16760	1191	DGKd	DLGVTK[+635.3]VGHMK	20	8.24933	558.981
Q16760	123	DGKd	K[+635.3]LILC[+57]ADNRK	16.6209	3.28113	566.989
			K[+635.3]LILC[+57]ADNR
Q16760	142	DGKd	EM[+16]EDWIAALK[+635.3]TVQNR	14.6575	NA	843.777
			EMEDWIAALK[+635.3]TVQNR
Q16760	198	DGKd	EALSGVTSHGLSC[+57]EVC[+57]K[+635.3]FK	20	0	1164.26
Q16760	214	DGKd	ATNNC[+57]K[+635.3]WTTLASIGK	20	6.47004	722.282
Q16760	271	DGKd	C[+57]LWC[+57]K[+635.3]AMVHTSC[+57]K	20	4.7758	771.96
Q16760	279	DGKd	AM[+16]VHTSC[+57]K[+635.3]ESLLTK	18.5487	3.93781	773.091
			AMVHTSC[+57]K[+635.3]ESLLTK
Q16760	285	DGKd	ESLLTK[+635.3]C[+57]PLGLC[+57]K	20	4.02781	729.057
Q16760	329	DGKd	ASC[+57]PPSC[+57]TSPLLVFVNSK[+635.3]SGDNQGVK	20	0	1188.26
Q16760	337	DGKd	SGDNQGVK[+635.3]FLR	7.56051	3.27658	764.857
			SGDNQGVK[+635.3]FLRR
Q16760	368	DGKd	LFQK[+635.3]FDTFR	20	5.82356	608.246
Q16760	441	DGKd	ASTK[+635.3]MLDR	11.0751	0.433654	555.513
			ASTK[+635.3]M[+16]LDR
Q16760	454	DGKd	WSVMAYEAK[+635.3]LPR	17.6462	3.32874	715.837
			WSVM[+16]AYEAK[+635.3]LPR
Q16760	505	DGKd	ILTSDQHSVVISSAK[+635.3]VLC[+57]ETVK	12.3013	4.19897	1076.27
Q16760	512	DGKd	VLC[+57]ETVK[+635.3]DFVAR	20	0	720.506
Q16760	520	DGKd	VGK[+635.3]AYEK	20	0.0386742	598.163
Q16760	524	DGKd	AYEK[+635.3]TTESSEESEVMAK	15.5358	6.31329	568.616
			AYEK[+635.3]TTESSEESEVM[+16]AK
Q16760	545	DGKd	EK[+635.3]LDSLLK	11.1288	8.18259	626.191
Q16760	617	DGKd	ANSLK[+635.3]K	20	4.41011	500.813
Q16760	62	DGKd	EGMLTK[+635.3]QNNSFQR	16.5248	4.91462	698.061
Q16760	673	DGKd	VC[+57]PPLSHSESFGVPK[+635.3]GR	12.532	NA	634.928
Q16760	682	DGKd	VSK[+635.3]SPC[+57]EK	11.3396	10.0002	600.757
Q16760	687	DGKd	SPC[+57]EK[+635.3]LISK	20	0.0790138	628.167
Q16760	691	DGKd	LISK[+635.3]GSLSLGSSASLPPQPGSR	20	0	532.514
Q16760	718	DGKd	DGLPALNTK[+635.3]ILYPNVR	20	8.8983	690.107
Q16760	783	DGKd	ISLDFNNK[+635.3]R	12.4447	1.89684	639.822
			ISLDFNNK[+635.3]RDEHPEK
Q16760	790	DGKd	RDEHPEK[+635.3]C[+57]R	20	5.86588	524.246
Q16760	796	DGKd	TK[+635.3]NMMWYGVLGTK	14.915	5.94649	705.097
			TK[+635.3]NMM[+16]WYGVLGTK
Q16760	815	DGKd	TYK[+635.3]NLEQK	5.18941	5.92119	669.578
Q16760	86	DGKd	TLYYAK[+635.3]TAK	17.4134	7.12133	695.741
Q16760	89	DGKd	TAK[+635.3]SIIFDEVDLTDASVAESSTK	14.3923	5.9379	800.328
Q16760	950	DGKd	AFESTLK[+635.3]SWEDKQK	20	5.22263	777.782
Q86XP1	462	DGKh	WSIMTY[+635.3]ELK	5.74632	0.326956	626.077
Q86XP1	765	DGKh	M[+16]LLANIDPFGATPFIDPDLDSVDGY[+635.3]SEK	20	0	975.838
			MLLANIDPFGATPFIDPDLDSVDGY[+635.3]SEK
Q86XP1	520	DGKh	TLC[+57]ETVK[+635.3]DFVAK	20	NA	594.83
Q86XP1	525	DGKh	DFVAK[+635.3]VEK	20	0	596.996
Q86XP1	532	DGKh	TYDK[+635.3]TLENAVVADAVASK	20	2.2116	622.696
Q86XP1	803	DGKh	TK[+635.3]NLMWYGVLGTR	6.74269	NA	513.279
Q5KSL6	515	DGKk	QY[+635.3]LNPSQVFDLLK	20	0	707.633
Q5KSL6	664	DGKk	AKY[+635.3]PTEMIIATR	11.1454	7.6318	606.976
			Y[+635.3]PTEMIIATR
Q5KSL6	737	DGKk	SATEY[+635.3]ADSSK	12.4777	4.50902	646.051
Q5KSL6	885	DGKk	DEHPGQY[+635.3]NSR	12.5652	1.66897	640.483
			RDEHPGQY[+635.3]NSR
Q5KSL6	895	DGKk	M[+16]WY[+635.3]GLLGTK	17.6832	NA	640.632
			MWY[+635.3]GLLGTK
Q5KSL6	1091	DGKk	LAENLISK[+635.3]LNDLSK	12.3419	10.8302	578.919
Q5KSL6	286	DGKk	K[+635.3]ITLAAPNRK	10.5212	6.07439	654.194
Q5KSL6	513	DGKk	FK[+635.3]QYLNPSQVFDLLK	9.72404	5.61417	571.944
Q5KSL6	594	DGKk	VLGWGAFWNK[+635.3]SK	0	0	620.46
Q5KSL6	892	DGKk	NK[+635.3]MWYGLLGTK	2.81025	1.6225	569.688
			NK[+635.3]M[+16]WYGLLGTK
Q5KSL6	901	DGKk	MWYGLLGTK[+635.3]ELLQR	10.5565	6.09483	639.465
P52429	206	DGKe	TDY[+635.3]EVLASK	20	0	621.181
P52429	407	DGKe	AVY[+635.3]LFYGTK	12.0914	NA	679.989
			AVY[+635.3]LFY[+635.3]GTK
P52429	410	DGKe	AVYLFY[+635.3]GTK	6.46572	7.87142	675.657
P52429	254	DGKe	ILLNPVQVFDVTK[+635.3]TPPIK	19.0031	5.09525	854.16
P52429	259	DGKe	TPPIK[+635.3]ALQLC[+57]TLLPYYSAR	9.22451	3.09888	854.056
P52429	296	DGKe	IK[+635.3]GQEK	20	5.2079	514.547
P52429	357	DGKe	VQVTNK[+635.3]GYYNLR	20	7.67631	582.918
P52429	413	DGKe	AVYLFYGTK[+635.3]DC[+57]LVQEC[+57]K	20	0	830.758
Q13574	319	DGKz	IIQSFLWY[+635.3]LNPR	20	2.00094	810.046
Q13574	340	DGKz	EALEM[+16]Y[+635.3]R	8.62615	5.29756	600.657
			EALEMY[+635.3]R
			EALEM[+16]Y[+635.3]RK
			EALEMY[+635.3]RK
Q13574	484	DGKz	M[+16]FY[+635.3]AGTAFSDFLMGSSK	20	0	917.105
			MFY[+635.3]AGTAFSDFLM[+16]GSSK
			MFY[+635.3]AGTAFSDFLMGSSK
Q13574	656	DGKz	VSM[+16]HDY[+635.3]EALHYDK	10.0523	4.80357	1118.33
			VSMHDY[+635.3]EALHYDK
			VSM[+16]HDY[+635.3]EALHYDKEQLK
			VSMHDY[+635.3]EALHYDKEQLK
Q13574	661	DGKz	VSMHDYEALHY[+635.3]DK	10.9504	4.78237	1143.98
			VSM[+16]HDYEALHY[+635.3]DK
			VSMHDYEALHY[+635.3]DKEQLK
			VSM[+16]HDYEALHY[+635.3]DKEQLK
Q13574	841	DGKz	Y[+635.3]LLDHAPPEILDAVEENGETC[+57]LHQAAALGQR	20	0	1355.46
Q13574	876	DGKz	TIC[+57]HY[+635.3]IVEAGASLM[+16]K	20	5.58304	900.44
			TIC[+57]HY[+635.3]IVEAGASLMK
Q13574	909	DGKz	AQDTELAAY[+635.3]LENR	20	2.47297	907.938
Q13574	123	DGKz	MLK[+635.3]SVSR	10.8725	5.57647	582.528
			M[+16]LK[+635.3]SVSR	20	0	1032.84
Q13574	134	DGKz	C[+57]AAC[+57]K[+635.3]IVVHTPC[+57]IEQLEK	20	3.82883	1116.49
Q13574	147	DGKz	IVVHTPC[+57]IEQLEK[+635.3]INFR	20	3.82883	1116.49
Q13574	189	DGKz	HC[+57]GK[+635.3]GFQQK	19.8907	0.154556	505.581
			C[+57]RHC[+57]GK[+635.3]GFQQK
Q13574	194	DGKz	GFQQK[+635.3]FTFHSK	16.9209	3.51438	578.78
Q13574	211	DGKz	EIVAISC[+57]SWC[+57]K[+635.3]QAYHSK	20	2.70175	1032.25
Q13574	256	DGKz	RPQNTLK[+635.3]ASK	20	0	524.192
Q13574	311	DGKz	SGGNQGAK[+635.3]IIQSFLWYLNPR	20	8.33677	627.244
Q13574	342	DGKz	K[+635.3]VHNLR	9.86915	4.58573	523.032
Q13574	370	DGKz	LK[+635.3]PPPPVAILPLGTGNDLAR	5.41007	4.02122	862.837
Q13574	403	DGKz	TLNWGGGYTDEPVSK[+635.3]ILSHVEEGNVVQLDR	11.3577	7.31119	1429.91
Q13574	473	DGKz	EANPEK[+635.3]FNSR	5.17939	2.92926	629.292
Q13574	481	DGKz	NK[+635.3]MFYAGTAFSDFLM[+16]GSSK	13.8947	2.92188	732.927
			NK[+635.3]MFYAGTAFSDFLMGSSK
			NK[+635.3]M[+16]FYAGTAFSDFLMGSSK
Q13574	498	DGKz	M[+16]FYAGTAFSDFLMGSSK[+635.3]DLAK	20	3.74635	1159
			MFYAGTAFSDFLM[+16]GSSK[+635.3]DLAK
			MFYAGTAFSDFLMGSSK[+635.3]DLAK
Q13574	502	DGKz	DLAK[+635.3]HIR	20	0	555.699
Q13574	516	DGKz	VVC[+57]DGMDLTPK[+635.3]IQDLKPQC[+57]VVFLNIPR	16.968	4.28791	1271.43
			VVC[+57]DGM[+16]DLTPK[+635.3]IQDLKPQC[+57]VVFLNIPR
Q13574	521	DGKz	IQDLK[+635.3]PQC[+57]VVFLNIPR	17.2224	7.48717	827.332
Q13574	59	DGKz	AITK[+635.3]SGLQHLAPPPPTPGAPC[+57]SESER	9.70713	7.06365	1099.21
Q13574	593	DGKz	EVVLTTSK[+635.3]AIPVQVDGEPC[+57]K	20	7.78083	869.721
Q13574	605	DGKz	AIPVQVDGEPC[+57]K[+635.3]LAASR	20	7.98421	840.531
Q13574	624	DGKz	NQATM[+16]VQK[+635.3]AK	18.9007	7.74248	762.068
			NQATMVQK[+635.3]AK
Q13574	663	DGKz	VSM[+16]HDYEALHYDK[+635.3]EQLK	6.81036	5.89039	1139.3
			VSMHDYEALHYDK[+635.3]EQLK
Q13574	667	DGKz	EQLK[+635.3]EASVPLGTVVVPGDSDLELC[+57]R	5.02556	2.37993	760.918
Q13574	704	DGKz	LQQEPDGAGAK[+635.3]SPTC[+57]QK	20	0	935.369
Q13574	714	DGKz	LSPK[+635.3]WC[+57]FLDATTASR	20	5.99041	780.487
Q13574	836	DGKz	TLLHHAVSTGSK[+635.3]DVVR	6.61328	4.36963	976.885
			TLLHHAVSTGSK[+635.3]
Q13574	886	DGKz	TIC[+57]HYIVEAGASLMK[+635.3]TDQQGDTPR	7.28504	5.0985	1315.77
Q13574	900	DGKz	QRAEK[+635.3]AQDTELAAYLENR	13.0057	4.50527	838.211
			AEK[+635.3]AQDTELAAYLENR
O75912	1046	DGKi	AQQAGDPDLAAY[+635.3]LESR	20	0	931.972
O75912	400	DGKi	VLQMFMWY[+635.3]LNPR	6.3811	4.20464	741.547
			VLQMFM[+16]WY[+635.3]LNPR
			VLQM[+16]FMWY[+635.3]LNPR
O75912	421	DGKi	DALELY[+635.3]RK	17.1696	3.78657	562.462
			DALELY[+635.3]R
O75912	477	DGKi	TLNWGGGY[+635.3]TDEPVSK	10.4863	10.6309	953.159
O75912	564	DGKi	M[+16]FY[+635.3]AGAAFSDFLQR	20	1.97725	796.13
			MFY[+635.3]AGAAFSDFLQR
			NKMFY[+635.3]AGAAFSDFLQR
O75912	613	DGKi	Y[+635.3]C[+57]AGTM[+16]PWGNPGDHHDFEPQR	11.2799	5.07224	1027.22
			Y[+635.3]C[+57]AGTMPWGNPGDHHDFEPQR
O75912	672	DGKi	EVM[+16]LLTY[+635.3]K	20	0	756.982
			EVMLLTY[+635.3]K
O75912	736	DGKi	ISLQDY[+635.3]EGFHYDK	5.60463	5.7376	943.017
			ISLQDY[+635.3]EGFHYDKEK
			ISLQDY[+635.3]EGFHY[+635.3]DKEK
O75912	741	DGKi	ISLQDYEGFHY[+635.3]DKEK	10.2519	4.59052	919.247
			ISLQDYEGFHY[+635.3]DK
O75912	788	DGKi	MY[+635.3]IDRLQEDLQSVSSGSQRx	19.8905	0.362928	773.786
			M[+16]Y[+635.3]IDRLQEDLQSVSSGSQR
O75912	904	DGKi	M[+16]LSDSGLGMIAPY[+635.3]YEDSDLK	14.6509	1.87606	1495.73
			M[+16]LSDSGLGMIAPY[+635.3]YEDSDLKDLSHSR
			MLSDSGLGMIAPY[+635.3]YEDSDLK
			MLSDSGLGMIAPY[+635.3]YEDSDLKDLSHSR
			MLSDSGLGM[+16]IAPY[+635.3]YEDSDLKDLSHSR
			MLSDSGLGM[+16]IAPY[+635.3]YEDSDLK
O75912	905	DGKi	M[+16]LSDSGLGMIAPYY[+635.3]EDSDLK	14.0284	5.88586	1478.91
			M[+16]LSDSGLGMIAPYY[+635.3]EDSDLKDLSHSR
			MLSDSGLGMIAPYY[+635.3]EDSDLK
			MLSDSGLGM[+16]IAPYY[+635.3]EDSDLKDLSHSR
			MLSDSGLGM[+16]IAPYY[+635.3]EDSDLK
			MLSDSGLGMIAPYY[+635.3]EDSDLKDLSHSR
O75912	946	DGKi	LIESY[+635.3]K	7.79721	8.35682	502.303
O75912	965	DGKi	NGGSLLIQGPDHC[+57]SLLHY[+635.3]AAK	7.36113	2.36924	968.763
O75912	977	DGKi	Y[+635.3]ILDHGPSELLDMADSETGETALHK	11.3954	0.587658	1218.79
			Y[+635.3]ILDHGPSELLDM[+16]ADSETGETALHK
O75912	1001	DGKi	YILDHGPSELLDMADSETGETALHK[+635.3]AAC[+57]QR	10.6028	13.2897	1271.61
O75912	1029	DGKi	GK[+635.3]TPQER	10.9447	2.61444	510.852
O75912	112	DGKi	GAGSAAAAGAAALDEPAAAGQK[+635.3]EK	20	0	1223.9
O75912	121	DGKi	EKDEALEEK[+635.3]LR	20	9.64379	693.59
O75912	203	DGKi	FAK[+635.3]SALR	20	8.45116	563.502
O75912	214	DGKi	C[+57]AVC[+57]K[+635.3]IVVHTAC[+57]IEQLEK	11.0495	7.07181	1069.57
O75912	227	DGKi	IVVHTAC[+57]IEQLEK[+635.3]INFR	20	6.83787	996.438
O75912	273	DGKi	GFQQK[+635.3]FSFHSK	5.71544	1.11325	551.475
O75912	290	DGKi	EIVAISC[+57]SWC[+57]K[+635.3]QAFHNK	20	0	995.22
O75912	329	DGKi	VKK[+635.3]PQNSLK	10.1026	1.05173	536.995
			K[+635.3]PQNSLK
O75912	335	DGKi	KPQNSLK[+635.3]ASNR	20	0	520.729
O75912	367	DGKi	GRPFVIK[+635.3]PISSPLMKPLLVFVNPK	20	0	1311.63
O75912	375	DGKi	GRPFVIKPISSPLMK[+635.3]PLLVFVNPK	8.22823	1.34055	1132.46
O75912	415	DGKi	QVFDLSQEGPK[+635.3]DALELYR	20	2.54141	1136.09
O75912	484	DGKi	TLNWGGGYTDEPVSK[+635.3]ILC[+57]QVEDGTVVQLDR	20	0	933.921
O75912	553	DGKi	EANPEK[+635.3]FNSR	5.12414	2.06374	644.697
O75912	561	DGKi	NK[+635.3]M[+16]FYAGAAFSDFLQR	20	0	732.551
			NK[+635.3]MFYAGAAFSDFLQR
O75912	582	DGKi	DLSK[+635.3]HVK	20	5.34659	552.748
O75912	585	DGKi	HVK[+635.3]VVC[+57]DGTDLTPK	20	0	715.937
O75912	596	DGKi	VVC[+57]DGTDLTPK[+635.3]IQELK	20	11.1976	907.913
O75912	673	DGKi	EVMLLTYK[+635.3]SIPM[+16]QVDGEPC[+57]R	20	0	841.883
			EVMLLTYK[+635.3]SIPMQVDGEPC[+57]R
O75912	704	DGKi	NQANMVQK[+635.3]SK	18.5689	7.8524	688.221
			NQANM[+16]VQK[+635.3]SK
O75912	730	DGKi	VNK[+635.3]ISLQDYEGFHYDK	17.1617	2.79781	970.168
			VNK[+635.3]ISLQDYEGFHYDKEK
			IRVNK[+635.3]ISLQDYEGFHYDK
O75912	743	DGKi	ISLQDYEGFHYDK[+635.3]EK	20	7.32044	927.046
			ISLQDYEGFHYDK[+635.3]EKLR
O75912	745	DGKi	ISLQDYEGFHYDKEK[+635.3]LR
O75912	947	DGKi	LIESYK[+635.3]NGGSLLIQGPDHC[+57]SLLHYAAK	20	0	1044.82
O75912	968	DGKi	NGGSLLIQGPDHC[+57]SLLHYAAK[+635.3]TGNGEIVK	14.8498	NA	1250.24
P52824	412	DGKq	VGVAY[+635.3]VSVR	5.06782	8.94633	637.316
P52824	202	DGKq	K[+635.3]TC[+57]GSSDVLAGVR	8.80541	8.24061	771.777
P52824	258	DGKq	LLPGGFSK[+635.3]TQSFR	20	0	642.639
P52824	297	DGKq	ETQATPESGK[+635.3]QTLK	20	0	731.12
P52824	400	DGKq	AQEVLK[+635.3]IYPGWLK	5.70035	3.2911	581.337
P52824	420	DGKq	VTPK[+635.3]STAR	10.0247	5.78774	543.292
P52824	596	DGKq	LPPDSC[+57]PLLVFVNPK[+635.3]SGGLK	0.861112	0.497163	1064.54
P52824	601	DGKq	SGGLK[+635.3]GR	6.35383	3.66838	525.165
P52824	768	DGKq	EEEPGK[+635.3]FTSR	6.07805	3.50917	533.515
P52824	786	DGKq	VGLQK[+635.3]ISHSR	6.56023	3.78755	518.441
P52824	795	DGKq	SLHK[+635.3]QIR	9.28157	5.35872	536.594
P52824	883	DGKq	VTLLK[+635.3]ATPVQVDGEPWVQAPGHMIISAAGPK	7.12175	4.11174	1210.32
	102	DGKaC1z	DVVC[+57]LNDVSC[+57]Y[+635.3]FSLLEGGRPEDK	20	0	1187.78
	122	DGKaC1z	LY[+635.3]DTDR	14.7112	3.31195	731.596
			LY[+635.3]DTDRNGILDSSEVDK
			LY[+635.3]DTDRNGILDSSEVDKIILQMM[+16]R
			LY[+635.3]DTDRNGILDSSEVDKIILQM[+16]MR
			LY[+635.3]DTDRNGILDSSEVDKIILQMMR
	148	DGKaC1z	VAEY[+635.3]LDWDVSELRPILQEM[+16]MK	18.5047	1.72658	1167.02
			VAEY[+635.3]LDWDVSELRPILQEMM[+16]K
			VAEY[+635.3]LDWDVSELRPILQEMMK
	169	DGKaC1z	EIDY[+635.3]DGSGSVSQAEWVR	20	0	996.468
	19	DGKaC1z	Y[+635.3]M[+16]EYSTK	11.2433	NA	632.541
			Y[+635.3]M[+16]EYSTKK
			Y[+635.3]MEYSTK
			Y[+635.3]MEY[+635.3]STK
			Y[+635.3]MEYSTKK
			Y[+635.3]M[+16]EY[+635.3]STK
			GLISPSDFAQLQKY[+635.3]M[+16]EYSTKK
	22	DGKaC1z	YMEY[+635.3]STK	10.6944	5.85186	641.086
			YMEY[+635.3]STKK
			YM[+16]EY[+635.3]STKK
			YM[+16]EY[+635.3]STK
	353	DGKaC1z	VSC[+57]FMLQQIEEPC[+57]SLGLRDHILPPSSIY[+635.3]PSVLASGPDR	13.5075	NA	1442.97
			DHILPPSSIY[+635.3]PSVLASGPDRK
			DHILPPSSIY[+635.3]PSVLASGPDR
	417	DGKaC1z	FQY[+635.3]ILNPR	20	9.08094	594.041
	42	DGKaC1z	Y[+635.3]VQGDAIGYEGFQQFLK	20	7.23433	997.232
	495	DGKaC1z	WGGGY[+635.3]EGQNLAK	14.321	6.68796	714.21
	50	DGKaC1z	YVQGDAIGY[+635.3]EGFQQFLK	20	0	1084.08
	542	DGKaC1z	SDPVPFQIINNY[+635.3]FSIGVDASIAHR	20	0	1320.97
	562	DGKaC1z	EKY[+635.3]PEK	12.6786	4.35735	575.141
			EKY[+635.3]PEKFNSR
	60	DGKaC1z	IY[+635.3]LEVDNVPR	10.6536	6.71316	677.74
	641	DGKaC1z	RPHGDIY[+635.3]GINQALGATAK	11.2512	6.46703	902.901
	687	DGKaC1z	RLEVVGLEGAIEMGQIY[+635.3]TK	11.7057	5.76411	1096.1
			RLEVVGLEGAIEM[+16]GQIY[+635.3]TK
			LEVVGLEGAIEM[+16]GQIY[+635.3]TK
			LEVVGLEGAIEMGQIY[+635.3]TK
	120	DGKaC1z	LEFTFK[+635.3]LYDTDR	20	NA	696.615
	137	DGKaC1z	NGILDSSEVDK[+635.3]IILQM[+16]MR	13.8297	NA	1033.04
			NGILDSSEVDK[+635.3]IILQMM[+16]R
			NGILDSSEVDK[+635.3]IILQMMR
			LYDTDRNGILDSSEVDK[+635.3]IILQMMR
			LYDTDRNGILDSSEVDK[+635.3]IILQM[+16]MR
	18	DGKaC1z	GLISPSDFAQLQK[+635.3]YMEYSTK	7.81005	3.64575	1143.15
			GLISPSDFAQLQK[+635.3]YMEYSTKK
			GLISPSDFAQLQK[+635.3]YM[+16]EYSTK
	231	DGKaC1z	M[+16]LK[+635.3]SVSR	20	6.52195	604.712
			MLK[+635.3]SVSR
	242	DGKaC1z	C[+57]AAC[+57]K[+635.3]IVVHTPC[+57]IEQLEK	6.63431	7.49632	1082.44
	25	DGKaC1z	YM[+16]EYSTK[+635.3]K	12.5918	7.58846	671.93
			YMEYSTK[+635.3]K
	255	DGKaC1z	IVVHTPC[+57]IEQLEK[+635.3]INFR	15.1774	7.16504	1118.09
	26	DGKaC1z	K[+635.3]VSDVLK	20	0	570.985
	297	DGKaC1z	C[+57]RHC[+57]GK[+635.3]GFQQK	20	0	534.507
			HC[+57]GK[+635.3]GFQQK
	302	DGKaC1z	GFQQK[+635.3]FTFHSK	20	0	658.268
	32	DGKaC1z	KVSDVLK[+635.3]LFEDGEMAK	16.6319	5.98299	960.95
			VSDVLK[+635.3]LFEDGEM[+16]AK
			VSDVLK[+635.3]LFEDGEMAK
	325	DGKaC1z	QAYHSK[+635.3]VSC[+57]FMLQQIEEPC[+57]SLGLR	14.245	3.64206	1119.69
			QAYHSK[+635.3]VSC[+57]FM[+16]LQQIEEPC[+57]SLGLR
	367	DGKaC1z	NSK[+635.3]TSQK	20	0	568.194
	371	DGKaC1z	TSQK[+635.3]TM[+16]DDLNLSTSEALR	20	NA	1436.34
			TSQK[+635.3]TM[+16]DDLNLSTSEALRIDPVPNTHPLLVFVNPK
			TSQK[+635.3]TMDDLNLSTSEALR
			TSQK[+635.3]TMDDLNLSTSEALRIDPVPNTHPLLVFVNPK
	402	DGKaC1z	IDPVPNTHPLLVFVNPK[+635.3]SGGK	9.27309	NA	1471.78
			IDPVPNTHPLLVFVNPK[+635.3]
			TMDDLNLSTSEALRIDPVPNTHPLLVFVNPK[+635.3]SGGK
			TM[+16]DDLNLSTSEALRIDPVPNTHPLLVFVNPK[+635.3]SGGK
	406	DGKaC1z	SGGK[+635.3]QGQR	20	0	578.884
	414	DGKaC1z	VLWK[+635.3]FQYILNPR	20	0	705.435
	429	DGKaC1z	QVFNLLK[+635.3]DGPEIGLR	20	0.632529	985.655
	440	DGKaC1z	LFK[+635.3]DVPDSR	20	0	709.653
	502	DGKaC1z	WGGGYEGQNLAK[+635.3]ILK	20	2.42292	938.076
	505	DGKaC1z	ILK[+635.3]DLEM[+16]SK	20	4.41372	753.16
			ILK[+635.3]DLEMSK
	561	DGKaC1z	EK[+635.3]YPEK	14.5056	4.0229	716.668
			EK[+635.3]YPEKFNSR
	652	DGKaC1z	RPHGDIYGINQALGATAK[+635.3]VITDPDILK	20	0	1456.36
	661	DGKaC1z	VITDPDILK[+635.3]TC[+57]VPDLSDK	17.6161	5.35531	1082.31
	670	DGKaC1z	TC[+57]VPDLSDK[+635.3]RLEVVGLEGAIEM[+16]GQIYTK	13.5515	0.345545	1170.41
			TC[+57]VPDLSDK[+635.3]RLEVVGLEGAIEMGQIYTK
			TC[+57]VPDLSDK[+635.3]R
	689	DGKaC1z	RLEVVGLEGAIEM[+16]GQIYTK[+635.3]LK	5.85706	8.25626	1130.66
			LEVVGLEGAIEMGQIYTK[+635.3]LK
			RLEVVGLEGAIEMGQIYTK[+635.3]LK
			LEVVGLEGAIEM[+16]GQIYTK[+635.3]LK
	699	DGKaC1z	LAK[+635.3]C[+57]SEITFHTTK	6.68571	6.43278	823.175
			RLAK[+635.3]C[+57]SEITFHTTK
	709	DGKaC1z	C[+57]SEITFHTTK[+635.3]TLPMQIDGEPWM[+16]QTPC[+57]TIK	10.6189	7.18307	1216.64
			C[+57]SEITFHTTK[+635.3]TLPM[+16]QIDGEPWMQTPC[+57]TIK
			C[+57]SEITFHTTK[+635.3]
			C[+57]SEITFHTTK[+635.3]TLPMQIDGEPWMQTPC[+57]TIK
	728	DGKaC1z	TLPMQIDGEPWMQTPC[+57]TIK[+635.3]ITHK	11.5811	5.42555	1218.96
			TLPM[+16]QIDGEPWMQTPC[+57]TIK[+635.3]ITHK
	732	DGKaC1z	ITHK[+635.3]NQMPMLM[+16]GPPPR	5.06989	3.43263	866.528
			ITHK[+635.3]NQM[+16]PMLMGPPPR
			ITHK[+635.3]NQMPMLMGPPPR
			ITHK[+635.3]NQMPM[+16]LMGPPPR
	1011	DGKzC1a	Y[+635.3]LLDHAPPEILDAVEENGETC[+57]LHQAAALGQR	20	NA	1274.26
	1046	DGKzC1a	TIC[+57]HY[+635.3]IVEAGASLMK	18.2632	0.576967	861.766
			TIC[+57]HY[+635.3]IVEAGASLM[+16]K
	1079	DGKzC1a	AQDTELAAY[+635.3]LENR	20	0	872.987
	284	DGKzC1a	STVDWSESATY[+635.3]GQHM[+16]WRPK	17.0641	5.44009	1044.67
			STVDWSESATY[+635.3]GQHMWRPK
	299	DGKzC1a	FPRPVY[+635.3]C[+57]NLC[+57]ESSIGLGK	20	0	835.4
	321	DGKzC1a	Y[+635.3]TVHDQC[+57]AM[+16]K	20	0	772.106
			Y[+635.3]TVHDQC[+57]AMK
	339	DGKzC1a	ALPC[+57]EVSTY[+635.3]AK	20	3.59926	715.39
	489	DGKzC1a	IIQSFLWY[+635.3]LNPR	11.4268	12.1243	778.991
	510	DGKzC1a	EALEM[+16]Y[+635.3]RK	12.2911	3.97047	627.355
			EALEMY[+635.3]RK
			EALEM[+16]Y[+635.3]R
			EALEMY[+635.3]R
	566	DGKzC1a	TLNWGGGY[+635.3]TDEPVSK	20	0	920.827
	654	DGKzC1a	M[+16]FY[+635.3]AGTAFSDFLMGSSK	13.8765	NA	711.181
			MFY[+635.3]AGTAFSDFLM[+16]GSSK
			MFY[+635.3]AGTAFSDFLMGSSK
	831	DGKzC1a	VSMHDYEALHY[+635.3]DK	15.094	6.93815	853.767
			VSMHDYEALHY[+635.3]DKEQLK
	1006	DGKzC1a	TLLHHAVSTGSK[+635.3]DVVR	9.0386	4.89454	899.707
	1056	DGKzC1a	TIC[+57]HYIVEAGASLMK[+635.3]TDQQGDTPR	7.86338	NA	954.079
	12	DGKzC1a	GK[+635.3]VPGPGEGQQRPSSVGLPTGK	17.4385	2.95781	948.761
	244	DGKzC1a	AAGPQAWSALLAK[+635.3]AITK	20	0	1012.72
	248	DGKzC1a	AITK[+635.3]SGLQHLAPPPPTPGAPC[+57]SESER	19.0565	0	1153.25
	311	DGKzC1a	FPRPVYC[+57]NLC[+57]ESSIGLGK[+635.3]QGLSC[+57]NLC[+57]K	20	NA	1019.14
	330	DGKzC1a	YTVHDQC[+57]AMK[+635.3]ALPC[+57]EVSTYAK	13.4351	7.58048	929.729
	341	DGKzC1a	ALPC[+57]EVSTYAK[+635.3]SR	20	0	745.967
	504	DGKzC1a	QVFDLSQGGPK[+635.3]EALEMYR	10.3386	13.6632	1191.04
	651	DGKzC1a	NK[+635.3]MFYAGTAFSDFLM[+16]GSSK	20	NA	687.331
			NK[+635.3]MFYAGTAFSDFLMGSSK
	672	DGKzC1a	DLAK[+635.3]HIR	20	5.80633	530.307
	686	DGKzC1a	VVC[+57]DGMDLTPK[+635.3]IQDLKPQC[+57]VVFLNIPR	9.20379	NA	1157.2
			VVC[+57]DGM[+16]DLTPK[+635.3]IQDLKPQC[+57]VVFLNIPR
	691	DGKzC1a	IQDLK[+635.3]PQC[+57]VVFLNIPR	12.1287	5.78835	772.165
	763	DGKzC1a	EVVLTTSK[+635.3]AIPVQVDGEPC[+57]K	5.01353	0.482567	881.746
	775	DGKzC1a	AIPVQVDGEPC[+57]K[+635.3]LAASR	20	10.3768	839.687
	874	DGKzC1a	LQQEPDGAGAK[+635.3]SPTC[+57]QK	20	0	905.387
	880	DGKzC1a	SPTC[+57]QK[+635.3]LSPK	10.9483	6.33563	696.26
	884	DGKzC1a	LSPK[+635.3]WC[+57]FLDATTASR	17.327	5.76397	688.684
	969	DGKzC1a	SLQGDAAPPQGEELIEAAK[+635.3]R	1.88101	2.12351	829.516
	975	DGKzC1a	RNDFC[+57]K[+635.3]LQELHR	10.2241	13.8251	632.374

## Sheet: C) Endogenous DGK
DGK isoforms found in endogenous data
Uniprot ID	Site position	Protein name	Peptide sequences	Best Byonic Score
P23743	148	DGKa	R.VAEY[+635.274]LDWDVSELRPILQEMMK.E	584.68
P23743	669	DGKa	K.RLEVVGLEGAIEMGQIY[+635.274]TK.L	902.92
			R.LEVVGLEGAIEMGQIY[+635.274]TK.L

## Sheet: D) DGK_AA_freq
Isoform	# Y sites	# K sites	%Y composition	%K composition
DGKa	21	50	2.9	6.8
DGKb	20	66	2.5	8.2
DGKg	23	53	2.9	6.7
DGKd	19	85	1.6	7
DGKh	24	87	2	7.1
DGKk	22	71	1.7	5.6
DGKe	18	39	3.2	6.9
DGKz	20	51	2.2	5.5
DGKi	21	61	2	5.7
DGKq	11	32	1.2	3.4
average	19.9	59.5	2.22	6.29

## Sheet: E) DGKB sites
Uniprot ID	Site position	Protein name	Peptide sequences	Mean	St.Dev.	Best byonic score
Q9Y6T7	24	DGKb	YAEY[+635.3]STK	20	10.2136	481.262
Q9Y6T7	45	DGKb	Y[+635.3]NPEGK	20	2.08366	498.541
Q9Y6T7	101	DGKb	SK[+635.3]PALLSGGLR	20	0	611.714
Q9Y6T7	113	DGKb	MNK[+635.3]GAITPPR	8.58724	3.9082	522.456
Q9Y6T7	450	DGKb	SGGK[+635.3]QGER	19.5315	2.27026	522.111
